# Supplementary material
Source: PubMed Central journal article supplement (PMC5316303)
Supplement: NIHMS838375-supplement.pdf [file NIHMS838375-supplement.pdf]

## Supplementary Materials

Cardiac Inflammation in Genetic Dilated Cardiomyopathy Caused by *MYBPC3* Mutation

Thomas L. Lynch IV,<sup>a,f</sup> Mohamed Ameen Ismahil,<sup>c</sup> Anil G. Jegga,<sup>c</sup> Michael J. Zilliox,<sup>a</sup>  
Christian Troidl,<sup>d</sup> Sumanth D. Prabhu,<sup>c</sup> and Sakthivel Sadayappan<sup>a,\*</sup>

<sup>a</sup>Department of Cell and Molecular Physiology and <sup>b</sup>Department of Public Health Sciences, Health Sciences Division, Loyola University Chicago, Maywood, IL 60153, USA

<sup>c</sup>Division of Cardiovascular Disease, University of Alabama at Birmingham, Birmingham, AL 35294, USA

<sup>d</sup>Kerckhoff Heart and Thorax Center, Department of Cardiology, Bad Nauheim, Germany

<sup>e</sup>Division of Biomedical Informatics, Cincinnati Children's Hospital Medical Center, Cincinnati, OH 45229, USA

<sup>f</sup>Department of Cell and Regenerative Biology, University of Wisconsin-Madison, Madison, WI 53715, USA

**Running Title:** Inflammation in Dilated Cardiomyopathy

\* To whom correspondence should be addressed: Sakthivel Sadayappan, PhD, MBA, Department of Internal Medicine, Heart, Lung and Vascular Institute, Division of Cardiovascular Health and Sciences, College of Medicine, University of Cincinnati, 231 Albert Sabin Way, Cincinnati, OH 45267-0575, USA. Phone: +1 513-558-7498; Fax: +1 513-558-2884; Email: sadayasl@ucmail.uc.edu

**Supplementary Table 1: Known human DCM-related or DCM-associated genes enriched in upregulated and downregulated genes in DCM mice**

| <b>Gene ID</b> | <b>Gene Symbol</b> | <b>Gene Description</b>                              | <b>DCM Mice</b> |
|----------------|--------------------|------------------------------------------------------|-----------------|
| 27063          | ANKRD1             | ankyrin repeat domain 1                              | Upregulated     |
| 6347           | CCL2               | C-C motif chemokine ligand 2                         | Upregulated     |
| 6320           | CLEC11A            | C-type lectin domain family 11 member A              | Upregulated     |
| 1734           | DIO2               | deiodinase, iodothyronine, type II                   | Upregulated     |
| 2070           | EYA4               | EYA transcriptional coactivator and phosphatase 4    | Upregulated     |
| 3958           | LGALS3             | galectin 3                                           | Upregulated     |
| 4314           | MMP3               | matrix metalloproteinase 3                           | Upregulated     |
| 4625           | MYH7               | myosin heavy chain 7                                 | Upregulated     |
| 58529          | MYOZ1              | myozenin 1                                           | Upregulated     |
| 4878           | NPPA               | natriuretic peptide A                                | Upregulated     |
| 4879           | NPPB               | natriuretic peptide B                                | Upregulated     |
| 27295          | PDLIM3             | PDZ and LIM domain 3                                 | Upregulated     |
| 57142          | RTN4               | reticulon 4                                          | Upregulated     |
| 5054           | SERPINE1           | serpin family E member 1                             | Upregulated     |
| 7076           | TIMP1              | TIMP metalloproteinase inhibitor 1                   | Upregulated     |
| 7099           | TLR4               | toll like receptor 4                                 | Upregulated     |
| 3371           | TNC                | tenascin C                                           | Upregulated     |
| 51086          | TNNI3K             | TNNI3 interacting kinase                             | Upregulated     |
| 203859         | ANO5               | anoctamin 5                                          | Downregulated   |
| 1346           | COX7A1             | cytochrome c oxidase subunit 7A1                     | Downregulated   |
| 1493           | CTLA4              | cytotoxic T-lymphocyte associated protein 4          | Downregulated   |
| 1063           | CENPF              | centromere protein F                                 | Downregulated   |
| 3751           | KCND2              | potassium voltage-gated channel subfamily D member 2 | Downregulated   |
| 9370           | ADIPOQ             | adiponectin, C1Q and collagen domain containing      | Downregulated   |
| 155            | ADRB3              | adrenoceptor beta 3                                  | Downregulated   |
| 8862           | APLN               | apelin                                               | Downregulated   |
| 4318           | MMP9               | matrix metalloproteinase 9                           | Downregulated   |
| 4607           | MYBPC3             | myosin binding protein C, cardiac                    | Downregulated   |

Supplementary Figures

Supplementary Figure 1.

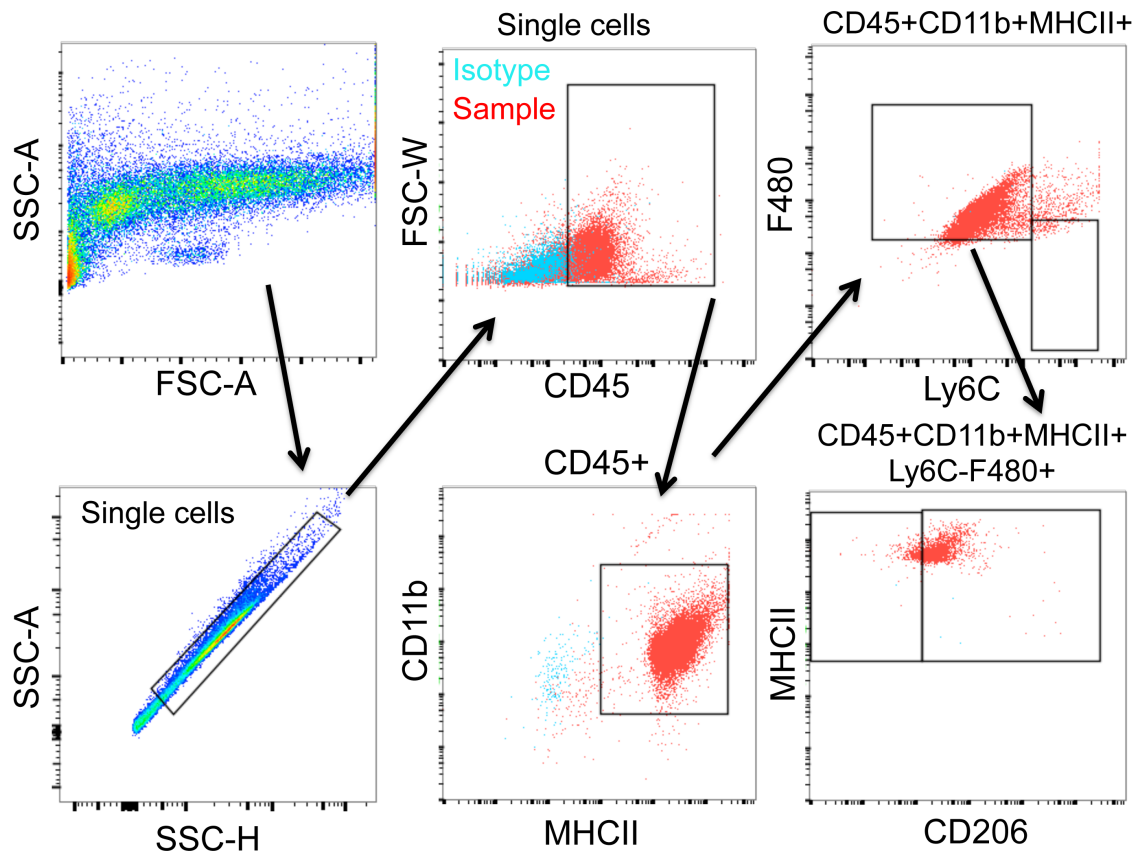

**Supplementary Fig. 1. Cardiac mononuclear cell gating strategy.** Representative gating strategy used to identify activated macrophages ( $CD45^+CD11b^+Ly6C^-MHCII^+F480^+$ ), proinflammatory M1 macrophages ( $CD45^+CD11b^+Ly6C^-MHCII^+F480^+CD206^-$ ), and anti-inflammatory M2 macrophages ( $CD45^+CD11b^+Ly6C^-MHCII^+F480^+CD206^+$ ) in WT and DCM hearts. FSC indicates forward scatter and SSC indicates side scatter.

## Supplementary Figure 2.

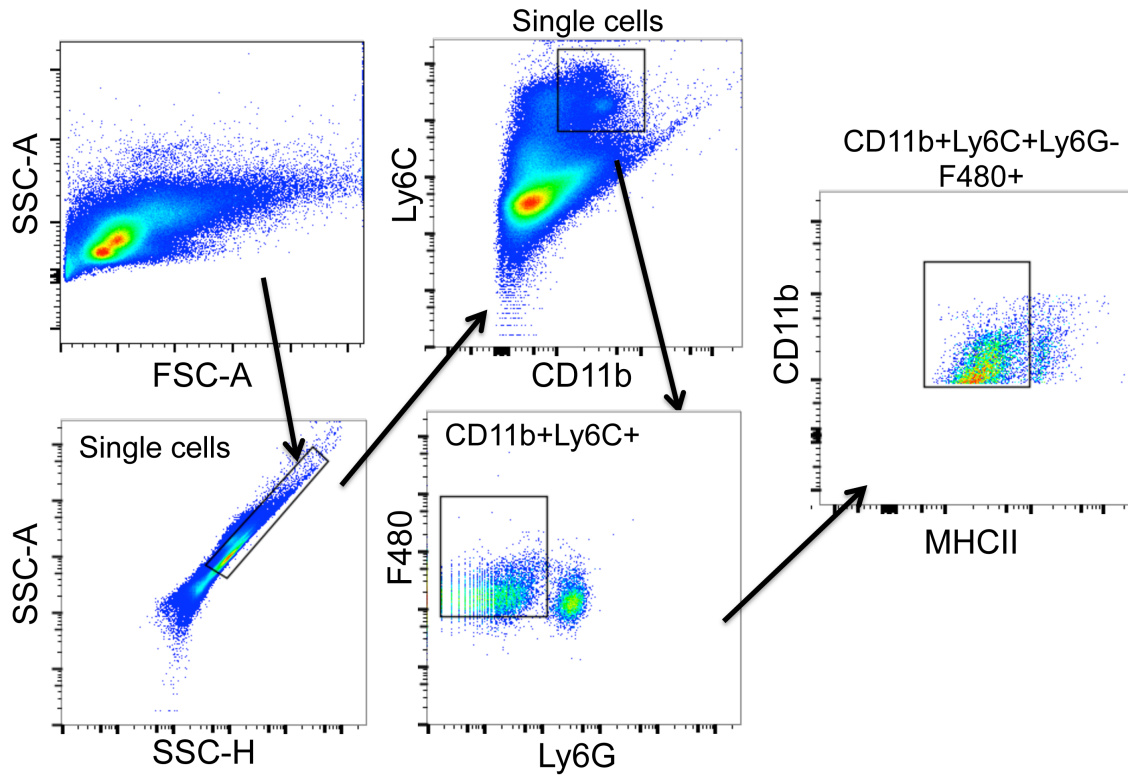

**Supplementary Fig. 2. Spleen gating strategy.** Representative gating strategy and used to identify splenic monocytes ( $CD11b^+Ly6C^+$  cells), monocytes within the red pulp region of the spleen ( $Ly6G^-CD11b^+Ly6C^+F480^{hi}$ ), and red pulp macrophages ( $CD11b^+Ly6C^+MHCII^{low}F480^{hi}$  cells) in WT and DCM spleens. FSC indicates forward scatter, and SSC indicates side scatter.

Supplementary Figure 3.

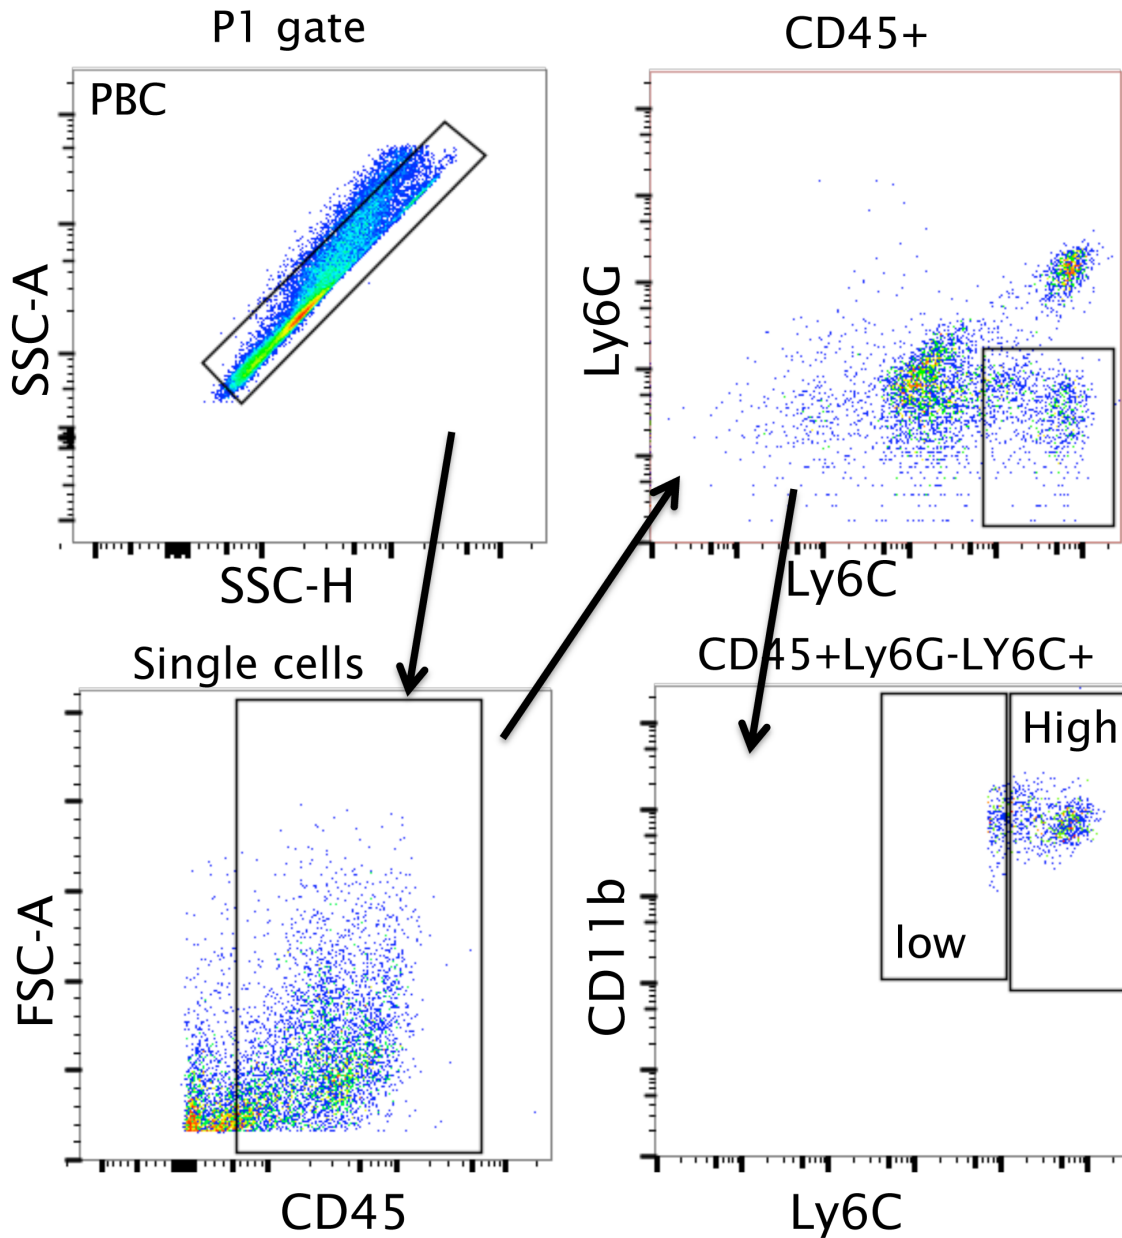

**Supplementary Fig. 3. Peripheral blood gating strategy.** Representative gating strategy used to identify total monocytes ( $CD45^+Gr1^-CD11b^+Ly6C^+$ ), proinflammatory monocytes ( $CD45^+Gr1^-CD11b^+Ly6C^{hi}$ ), and anti-inflammatory monocytes ( $CD45^+Gr1^-CD11b^+Ly6C^{low}$ ) within peripheral blood samples from WT and DCM mice. FSC indicates forward scatter, and SSC indicates side scatter.
